# Supplementary material for: Prediction of Optimal Conditions of Hydrogenation Reaction Using the Likelihood Ranking Approach
Source: MDPI journal article supplement (doi:10.3390/ijms23010248), 2021-12-27

## Supporting Information

# Prediction of Optimal Conditions of Hydrogenation Reaction using the Likelihood Ranking Approach

Valentina A. Afonina<sup>1</sup>, Daniyar A. Mazitov<sup>1</sup>, Albina Nurmukhametova<sup>1</sup>, Maxim D. Shevelev<sup>1,2</sup>, Dina A. Khasanova<sup>1</sup>, Ramil I. Nugmanov<sup>1</sup>, Vladimir A. Burilov<sup>1</sup>, Timur I. Madzhidov<sup>1,\*</sup>, Alexandre Varnek<sup>2,3,\*</sup>

<sup>1</sup> Chemoinformatics and Molecular Modelling Lab, A.M. Butlerov Institute of Chemistry, Kazan Federal University, Kremlyovskaya str. 18, 420008 Kazan, Russia; [ValAAfonina@kpfu.ru](mailto:ValAAfonina@kpfu.ru) (V.A.A.); [DaniAMazitov@kpfu.ru](mailto:DaniAMazitov@kpfu.ru) (D.A.M.); [albinka2491@mail.ru](mailto:albinka2491@mail.ru) (A.T.N.); [mdshev7@gmail.com](mailto:mdshev7@gmail.com) (M.D.S.); [DAHasanova@stud.kpfu.ru](mailto:DAHasanova@stud.kpfu.ru) (D.A.K.); [nougmanoff@hotmail.com](mailto:nougmanoff@hotmail.com) (R.I.N.); [Vladimir.Burilov@kpfu.ru](mailto:Vladimir.Burilov@kpfu.ru) (V.A.B.)

<sup>2</sup> Laboratory of Chemoinformatics (UMR 7140 CNRS/UniStra), Université de Strasbourg, 4, rue Blaise Pascal, 67000 Strasbourg, France

<sup>3</sup> Institute for Chemical Reaction Design and Discovery (WPI-ICReDD), Hokkaido University, Kita 21 Nishi 10, Kita-ku, Sapporo 001-0021, Japan

\* Correspondence: [timur.madzhidov@kpfu.ru](mailto:timur.madzhidov@kpfu.ru) (T.I.M.); [varnek@unistra.fr](mailto:varnek@unistra.fr) (A.V.)

## Table of Contents

|                                                                           |    |
|---------------------------------------------------------------------------|----|
| Appendix A1. Condition curation procedure.....                            | 3  |
| Figure S1. Scheme of temperature standardization.....                     | 3  |
| Figure S2. Scheme of pressure standardization.....                        | 4  |
| Figure S3. Standardization scheme of 'raw' names of chemical agents ..... | 5  |
| Figure S4. Raw and standardized names and tags of chemical agents.....    | 6  |
| Appendix A2. Additional reaction conditions curation results.....         | 7  |
| Table S1. Statistics for synonyms dictionary.....                         | 7  |
| Appendix A3. Training / test sets preparation .....                       | 8  |
| Figure S5. Training / test datasets splitting scheme.....                 | 8  |
| Appendix A4. List of the most common catalysts in the training set .....  | 9  |
| Appendix A5. Null model statistics .....                                  | 10 |
| Table S2. Top-ten most frequent conditions in the training set .....      | 10 |
| Appendix A6. Mean Reciprocal Rank calculation .....                       | 11 |
| Figure S6. Example of the Mean Reciprocal Rank calculation.....           | 11 |

|                                                                                                                                                                  |    |
|------------------------------------------------------------------------------------------------------------------------------------------------------------------|----|
| Appendix A7. Additional validation of the performance of the models.....                                                                                         | 12 |
| Figure S7. Cumulative histogram of the P@K on training set in 5-fold cross-validation vs K .....                                                                 | 12 |
| Figure S8. Cumulative histogram of the P@K on test sets in applicability domain vs K .....                                                                       | 12 |
| Appendix A8. List of all possible products, manually generated for 1-benzyloxy-3-nitrobenzene, 1-benzyloxy-3-chlorobenzene, and 1-benzyloxy-4-nitrobenzene ..... | 13 |
| Figure S9. All possible products, manually generated for 1-benzyloxy-3-nitrobenzene .....                                                                        | 13 |
| Figure S10. All possible products, manually generated for 1-benzyloxy-3-chlorobenzene .....                                                                      | 14 |
| Figure S11. All possible products, manually generated for 1-benzyloxy-4-nitrobenzene .....                                                                       | 15 |

## Appendix A1. Condition curation procedure

Figure S1. Scheme of temperature standardization

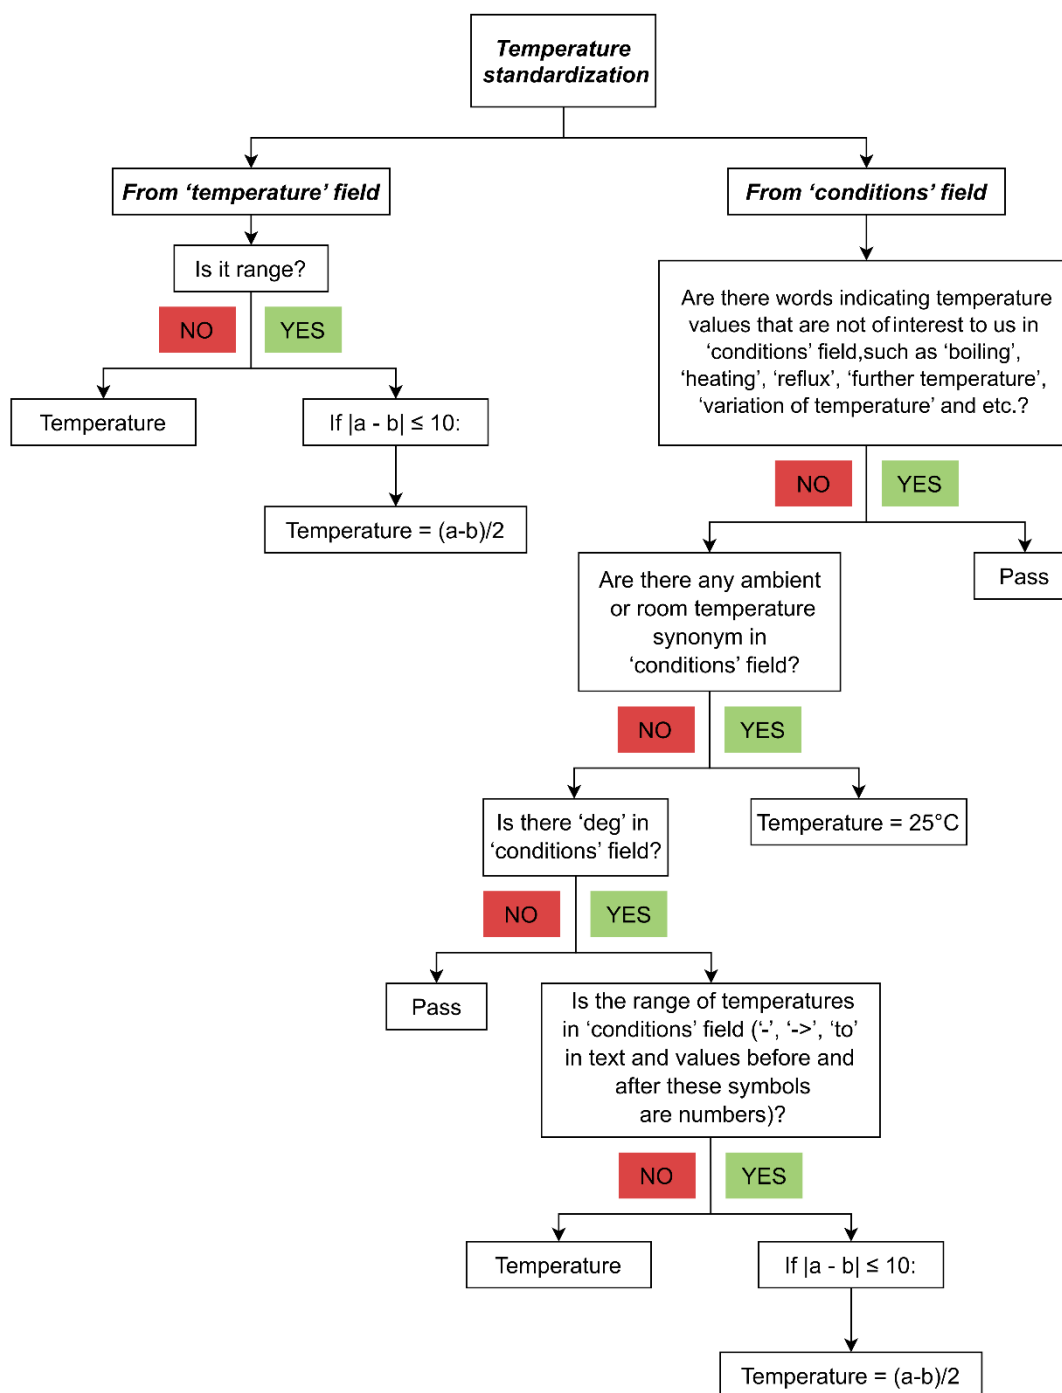

Figure S2. Scheme of pressure standardization

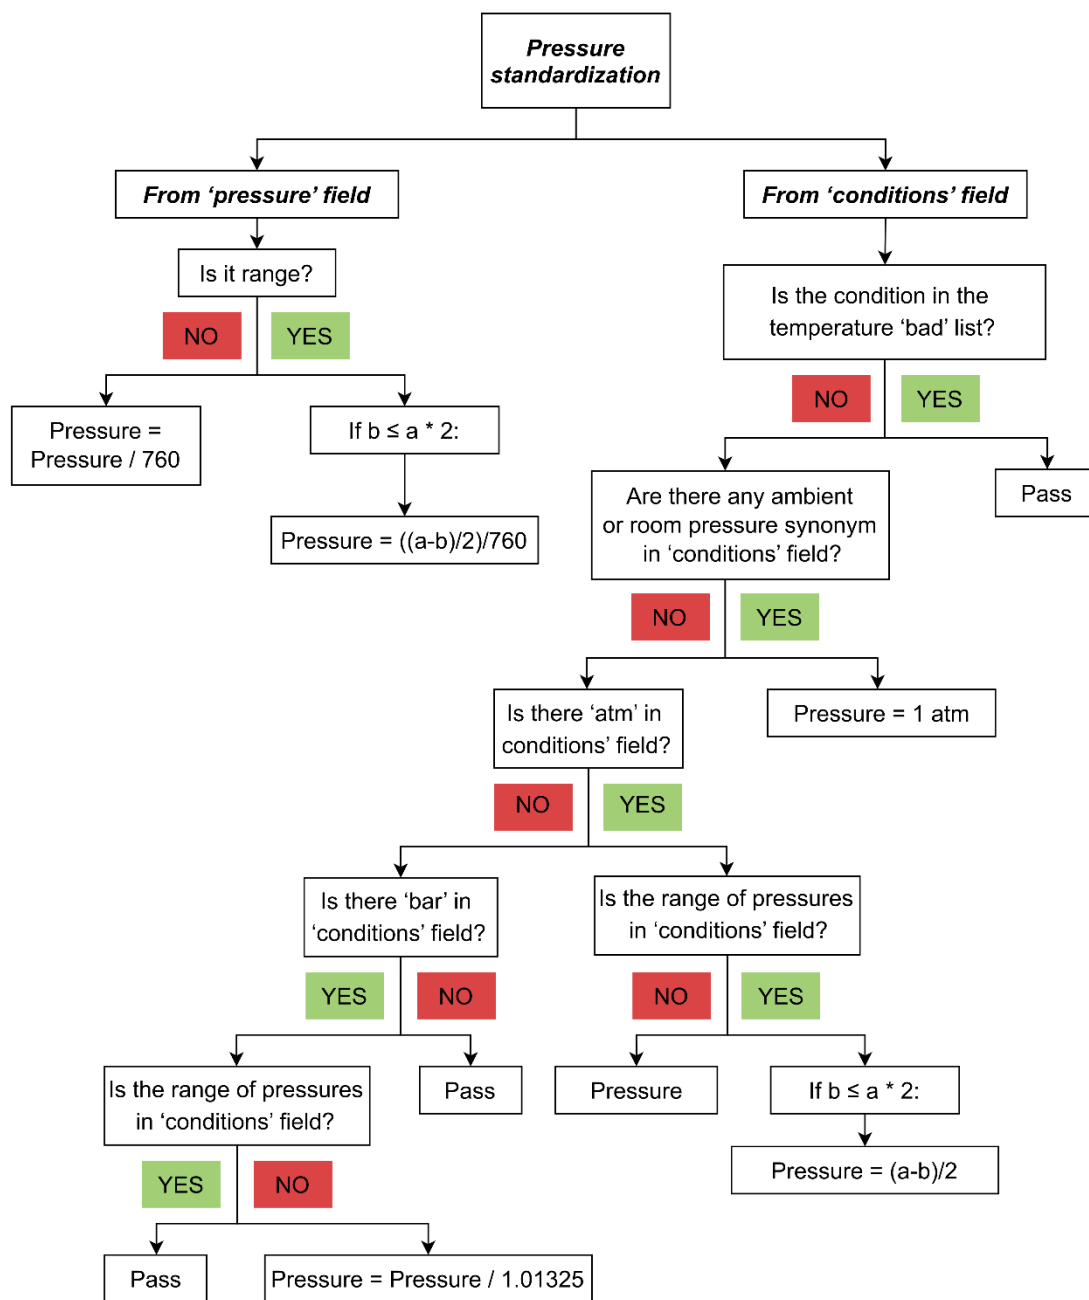

Figure S3. Standardization scheme of 'raw' names of chemical agents

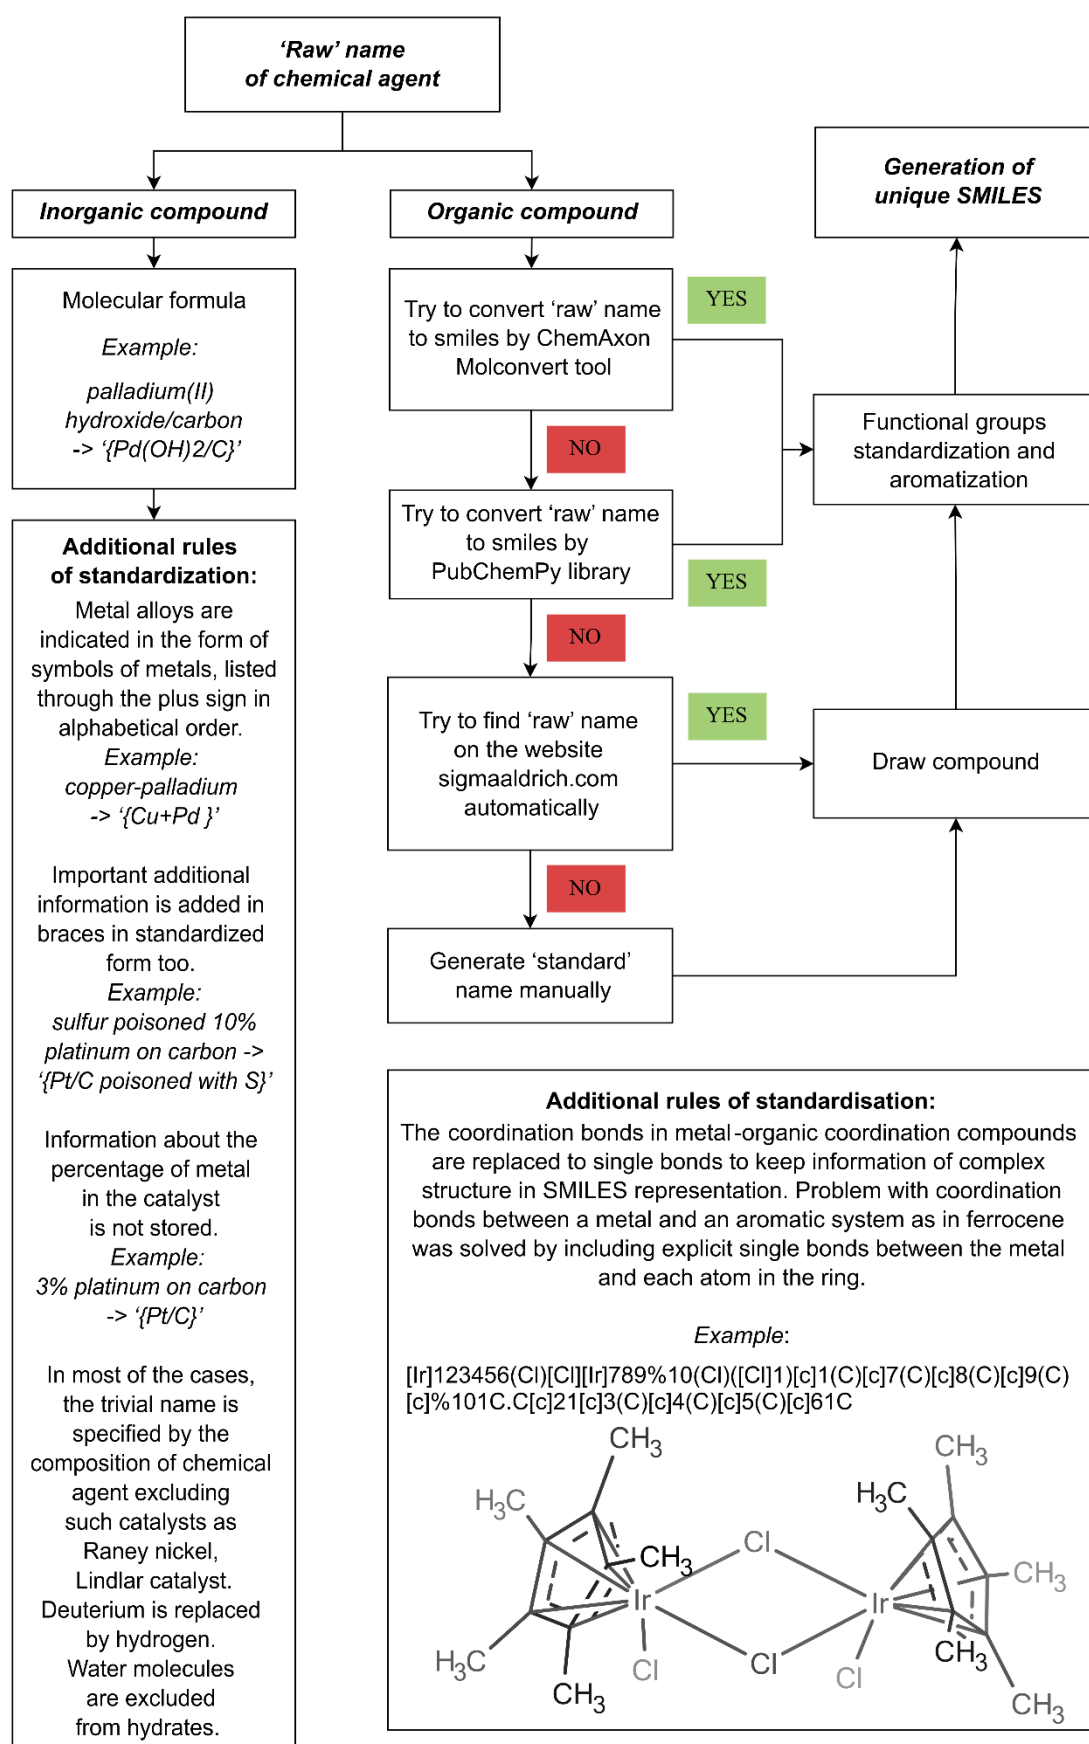

Figure S4. Raw and standardized names and tags of chemical agents

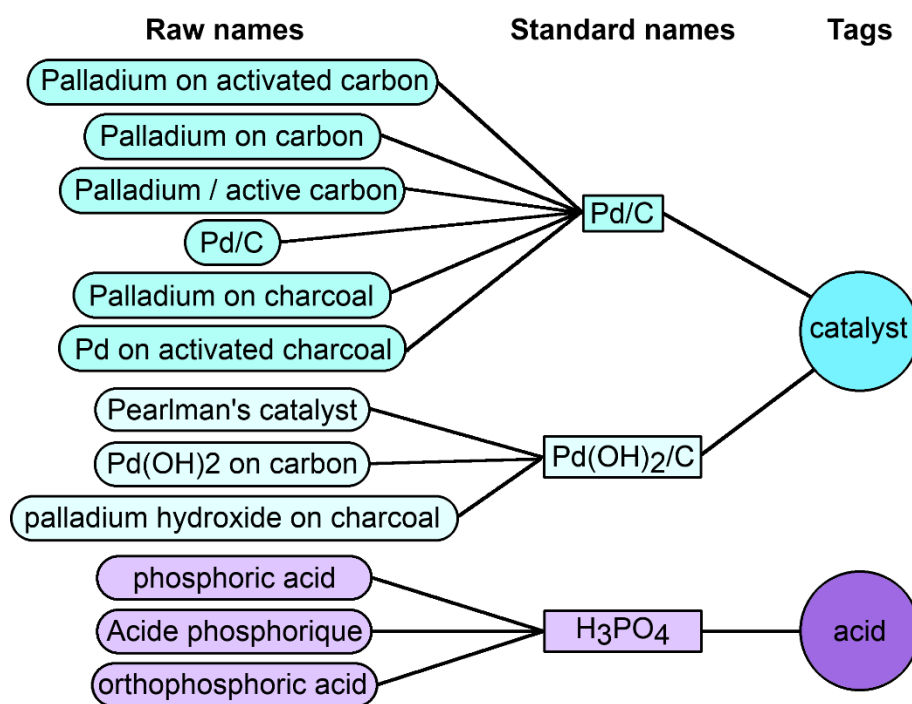

## Appendix A2. Additional reaction conditions curation results

**Table S1.** Statistics for synonyms dictionary

|                                                                                                        |                |
|--------------------------------------------------------------------------------------------------------|----------------|
| Number of unique “raw” names in the initial dataset                                                    | 28464          |
| Number of unique standard names in the initial dataset                                                 | 2323           |
| Number of unique standardized “raw” names                                                              | 4408           |
| Number of standard names for which the tags were added                                                 | 1125           |
| Number of added tags                                                                                   | 1235           |
| Number of unique catalyst standard names                                                               | 662            |
| Maximum number of ‘raw’ names for one standard name before standardization                             | 416            |
| Maximum number of ‘raw’ names for one catalyst                                                         | 416            |
| Maximum number of ‘raw’ names for one any other chemical agents                                        | 10 [methanol]  |
| Number of reactions for which all names of chemical agents were standardized in initial dataset        | 495011, 87.32% |
| Number of reactions for which at least one name of chemical agents was standardized in initial dataset | 561880, 99.11% |
| Number of reactions for which only one name of chemical agents was not standardized                    | 67097          |
| Number of reactions for which all names of chemical agents were not standardized                       | 2936           |
| Coverage of standardization (frequency of standardized names / frequency of raw names)                 | 95.61%         |

### Appendix A3. Training / test sets preparation

Figure S5. Training / test datasets splitting scheme

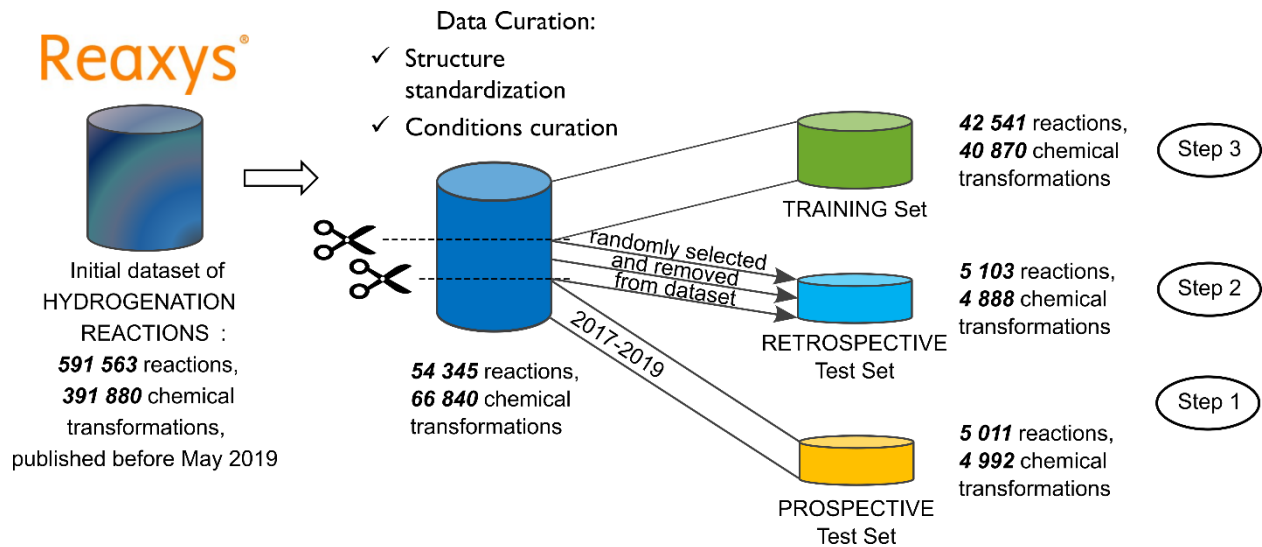



#### Appendix A4. List of the most common catalysts in the training set

1. Nickel catalyst (unknown type)
2. Raney nickel catalyst
3. Lindlar catalyst
4. Palladium(II) acetate
5. Palladium hydroxide(II) on carbon
6. Palladium hydroxide(II)
7. Palladium on aluminium oxide
8. Palladium on barium sulfate
9. Palladium on carbon
10. Palladium(II) chloride
11. Palladium catalyst (unknown type)
12. Platinum on aluminium oxide
13. Platinum on carbon
14. Platinum oxide(IV)
15. Platinum catalyst (unknown type)
16. Chloro(1,5-cyclooctadiene)rhodium (I) dimer
17. Dicarbonyl(acetylacetonato)rhodium(I)
18. Dirhodium tetraacetate
19. Tris(triphenylphosphine)rhodium(I) chloride
20. Bis(1,5-cyclooctadiene)rhodium(I) tetrafluoroborate
21. Tris(triphenylphosphine)rhodium carbonyl hydride
22. Bis(1,5-cyclooctadiene)rhodium(I) trifluoromethanesulfonate
23. 1,2-bis-[2,5-diethylphospholano] benzene(cyclooctadiene) rhodium(I) trifluoromethanesulfonate
24. Rhodium on aluminium oxide
25. Rhodium on carbon
26. Ruthenium on carbon
27. Bis(1,5-cyclooctadiene)diiridium(I) dichloride
28. Dicobalt octacarbonyl
29. Copper catalyst (unknown type)

## Appendix A5. Null model statistics

**Table S2.** Top-ten most frequent conditions in the training set

| Rank | Temperature <sup>a</sup> | Pressure <sup>b</sup> | Additives <sup>c</sup> | Catalyst                      | Percent of reactions in the training set |
|------|--------------------------|-----------------------|------------------------|-------------------------------|------------------------------------------|
| 1    | Medium                   | Low                   | -                      | Palladium on carbon           | 35.3                                     |
| 2    | Medium                   | Medium                | -                      | Palladium on carbon           | 13.6                                     |
| 3    | Medium                   | High                  | -                      | Palladium on carbon           | 3.0                                      |
| 4    | Medium                   | Low                   | -                      | Palladium hydroxide on carbon | 2.4                                      |
| 5    | Medium                   | Low                   | Acid                   | Palladium on carbon           | 2.3                                      |
| 6    | High                     | High                  | -                      | Palladium on carbon           | 2.1                                      |
| 7    | Medium                   | Low                   | -                      | Platinum(IV) oxide            | 2.0                                      |
| 8    | High                     | High                  | -                      | Unknown nickel catalyst       | 1.8                                      |
| 9    | High                     | Medium                | -                      | Palladium on carbon           | 1.7                                      |
| 10   | Medium                   | Low                   | -                      | Unknown nickel catalyst       | 1.7                                      |

<sup>a</sup> Temperature: low - less 0 °C , medium - 0-50 °C , high - more 50 °C

<sup>b</sup> Pressure: low - 0-3 atm, medium - 3-10 atm, high - more 10 atm

<sup>c</sup> Additives: “-” – the absence of any additive; acid, poison, base – the presence of an appropriate additive; other additives – the presence of any other additives except the acid, base or catalyst poison

The total number of unique combinations of conditions in the training set is 759.

## Appendix A6. Mean Reciprocal Rank calculation

Figure S6. Example of the Mean Reciprocal Rank calculation

### Reaction 1

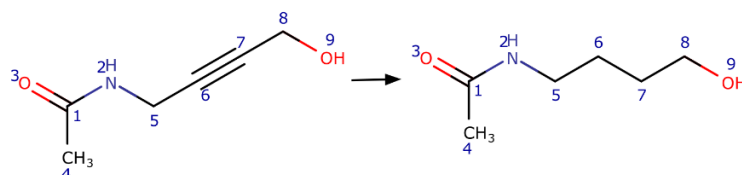

Reaction ID = 1108621

#### Sorted list of the predicted condition components combinations for Reaction 1:

1. Medium temperature, low pressure, unknown nickel catalyst, acid
2. Medium temperature, low pressure, unknown nickel catalyst
3. High temperature, high pressure, palladium on carbon
4. Low temperature, low pressure, palladium on carbon, base
5. Medium temperature, high pressure, unknown nickel catalyst, base

rank of  
experimental  
reaction  
conditions

$R_1 = \{2\}$

real experimental data  
from literature

### Reaction 2

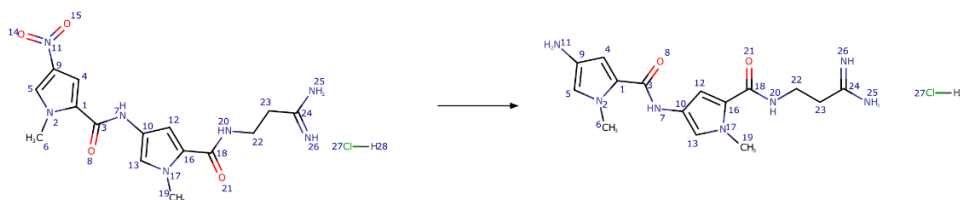

Reaction ID = 2244983

#### Sorted list of the predicted condition components combinations for Reaction 2:

1. High temperature, low pressure, palladium on carbon
2. Medium temperature, low pressure, unknown nickel catalyst
3. Medium temperature, low pressure, palladium on carbon
4. Low temperature, low pressure, palladium on carbon, base
5. Medium temperature, high pressure, unknown nickel catalyst, base

$R_2 = \{1, 3\}$

$$MRR@K = \frac{1}{N} \sum_i \frac{1}{\min(R_i(K))}$$

Mean Reciprocal Rank for two reactions - Reaction 1 and Reaction 2 - at  $K = 3$  will be calculated by formula above.

$N = 2$  (two reactions)

$R_i$  is the list of ranks of relevant items (corresponding to experimental reaction conditions)

For Reaction 1:

$R_1 = \{2\}$ ; at  $K = 3$  (max used rank = 3)  $R_1 = \{2\}$

For Reaction 2:

$R_2 = \{1, 3\}$ ; at  $K = 3$   $R_2 = \{1, 3\}$

$$MRR@3 = \frac{1}{2} * \left( \frac{1}{2} + \frac{1}{\min(1, 3)} \right) = 0.75$$

## Appendix A7. Additional validation of the performance of the models

**Figure S7.** Cumulative histogram of the P@K on training set in 5-fold cross-validation vs K

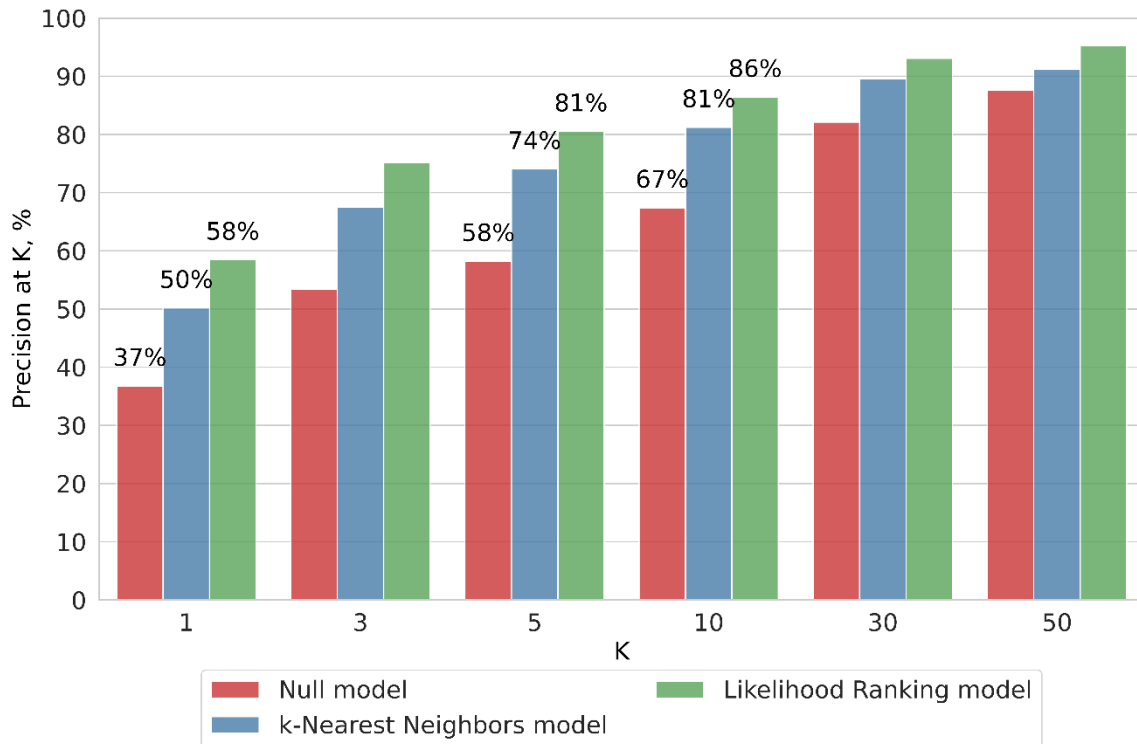

**Figure S8.** Cumulative histogram of the P@K on test sets in applicability domain vs K

a, b – retrospective test set, c, d – prospective test set; a, c – pressure is ignored

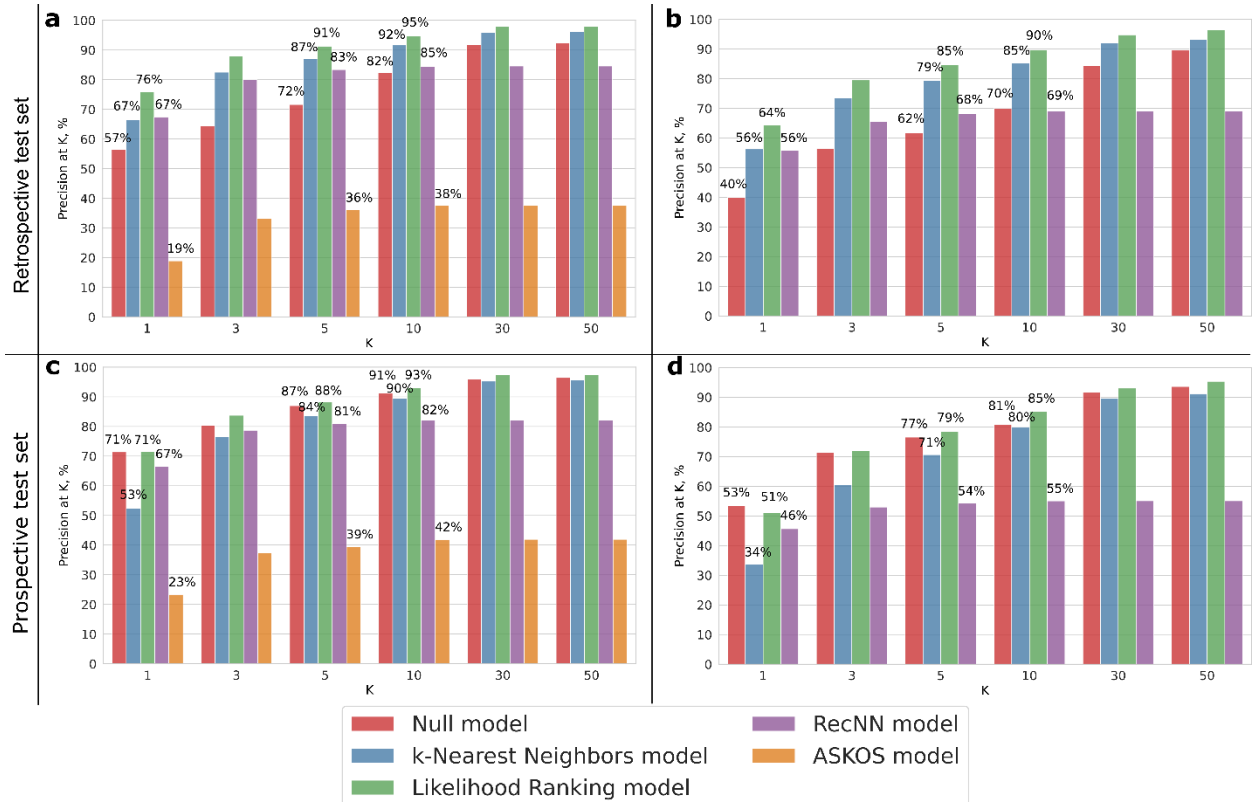

**Appendix A8. List of all possible products, manually generated for 1-benzyloxy-3-nitrobenzene, 1-benzyloxy-3-chlorobenzene, and 1-benzyloxy-4-nitrobenzene**

**Figure S9.** All possible products, manually generated for 1-benzyloxy-3-nitrobenzene

Product in the applicability domain is surrounded by a green frame

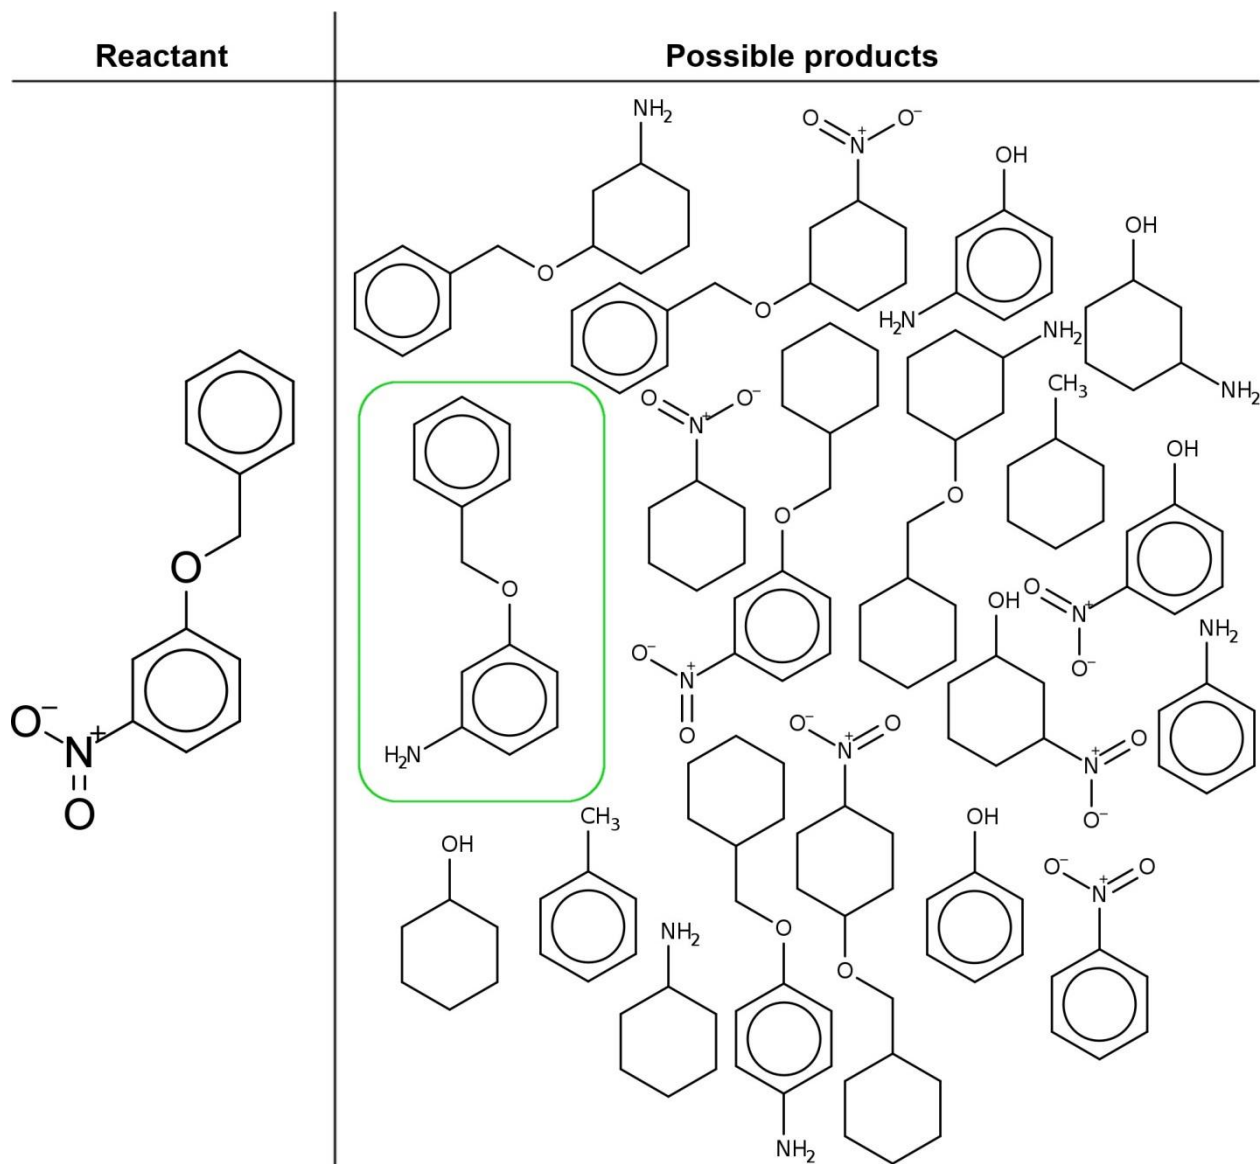

**Figure S10.** All possible products, manually generated for 1-benzyloxy-3-chlorobenzene

All products are outside the applicability domain

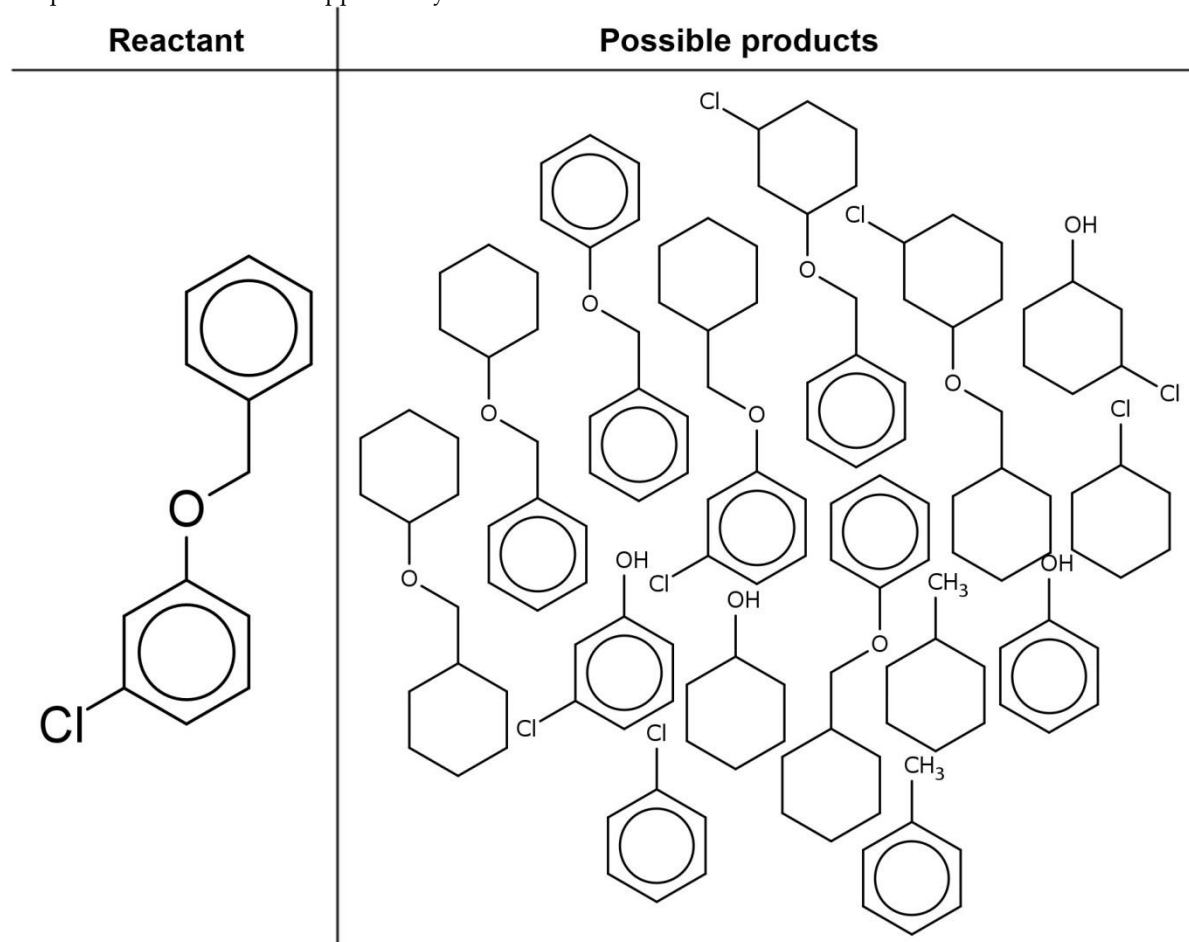

**Figure S11.** All possible products, manually generated for 1-benzyloxy-4-nitrobenzene

Products in the applicability domain are surrounded by a green frame

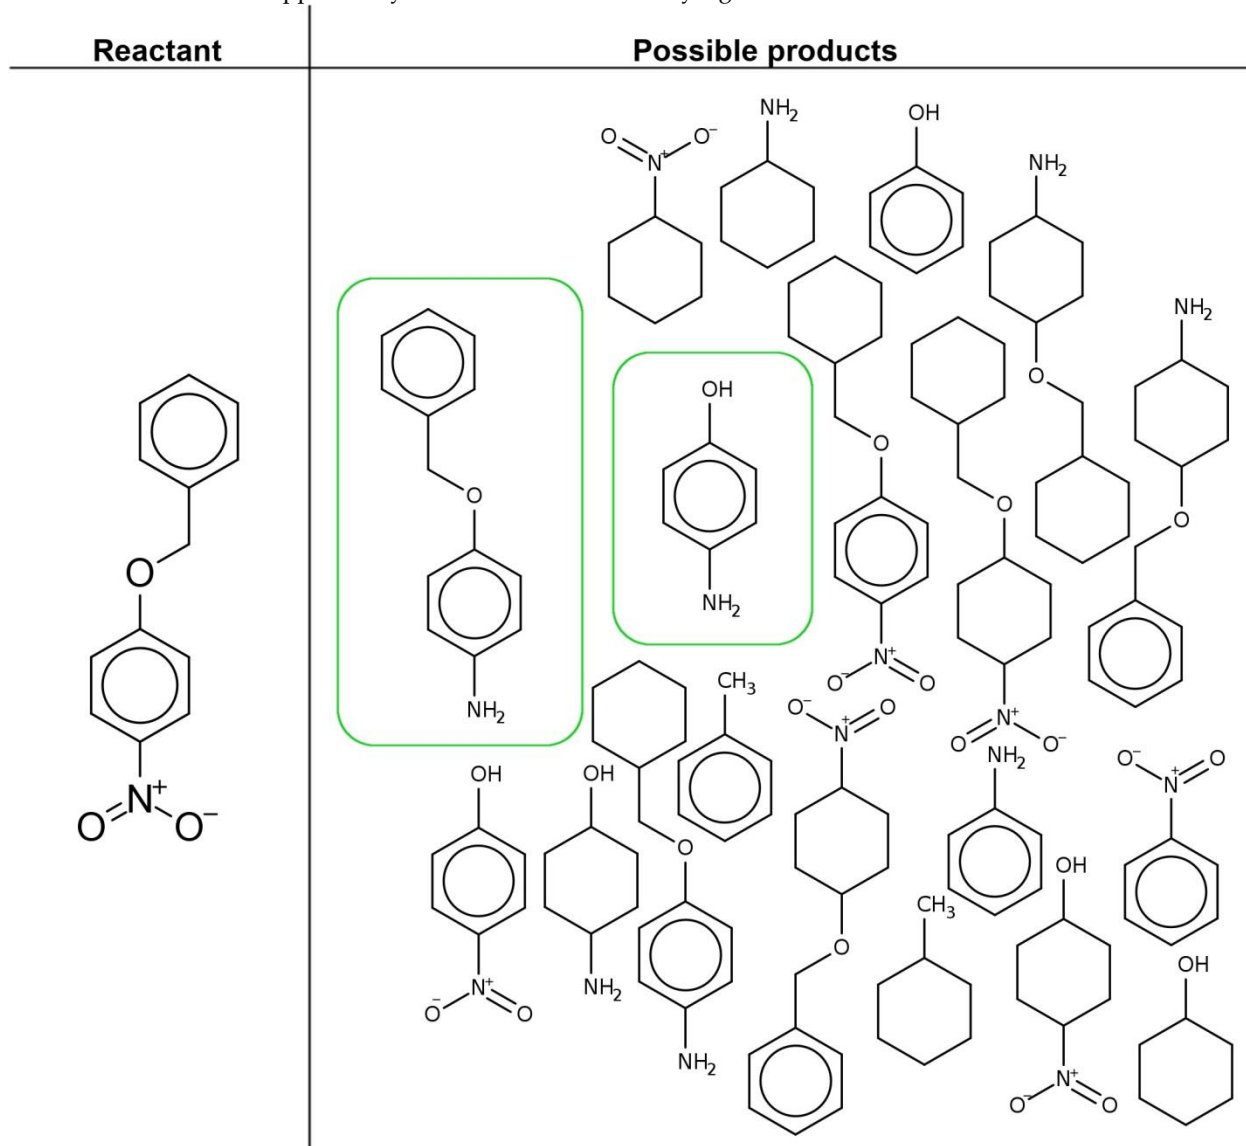

Supplement: s1 [file s1]
